# Supplementary material
Source: Springer Nature journal article supplement (https://www.springerprofessional.de/resource/supplementary/13638_2014_956_MOESM5_ESM.pdf/11898854)

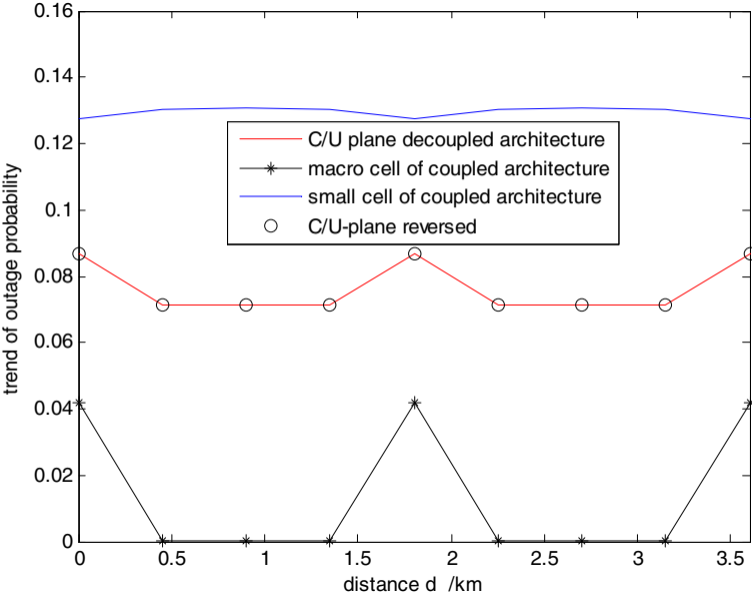

Supplement: MOESM5 [file 11898854]
